# Supplementary material for: The Nuclear Localization of γ-Tubulin Is Regulated by SadB-mediated Phosphorylation
Source: PubMed Central journal article supplement (PMC4118101; doi:10.1074/jbc.m114.562389), 2014-06-18
Supplement: supp_M114.562389_jbc.M114.562389-1.pdf [file supp_M114.562389_jbc.M114.562389-1.pdf]

The nuclear localization of  $\gamma$ -tubulin is regulated by SadB-mediated phosphorylation

Greta Eklund, Stefan Lang, Johan Glindre, Åsa Ehlén and Maria Alvarado-Kristensson

**Supplemental Video**

Supplemental Video S1. Illustrates DIC images of a mitotic U2OS cell expressing cytosolic D385-C $\gamma$ -tubGFP ( $n = 14$ ,  $n$  represents the number of recorded mitotic cells).

Supplemental Video S2. Illustrates confocal images of the mitotic U2OS cell expressing cytosolic D385-C $\gamma$ -tubGFP (green) shown in Supplemental Video S1.

Supplemental Video S3. Illustrates DIC images of a mitotic U2OS cell expressing S385-C $\gamma$ -tubGFP ( $n = 6$ ,  $n$  represents the number of recorded mitotic cells).

Supplemental Video S4. Illustrates confocal images of the mitotic U2OS cell expressing S385-C $\gamma$ -tubGFP (green) shown in Supplemental Video S3.
